# Supplementary material for: The Neurolexic Effect: How Medical Terminology Modulates Neuroplasticity in Post-Stroke Recovery
Source: Research Square preprint supplement (doi:10.21203/rs.3.rs-7842079/v1), 2025-10-15
Supplement: Supplementary file 1 [file f7501459f3c3e0d0f3db5c51.docx]

**Supplementary Materials**

*The Neurolexic Effect: Medical Terminology as a Neuromodulatory Intervention in Post-Stroke Rehabilitation*

Ibrahim Npochinto Moumeni, BPT, MPT, PhD, DO

# Contents

Supplementary Table S1: Detailed Clinical Parameters Across Five Cases

Supplementary Material S1: Neurolexic Intervention Protocol

Supplementary Material S2: Structured Therapeutic Scripts

Supplementary Material S3: Cultural Adaptation Framework

Supplementary Material S4: Extended Case Narratives

Supplementary Material S5: Neurolexic Assessment Tools

# Supplementary Table S1: Detailed Clinical Parameters Across Five Cases

*This table provides comprehensive clinical, demographic, and outcome data for all five cases presented in the main manuscript. Parameters include baseline functional status, intervention details, quantitative outcome measures, and follow-up duration.*

| **Parameter** | **Case 1 (Marseille)** | **Case 2 (Bafoussam)** | **Case 3 (Vitry)** | **Case 4 (Foumbot)** | **Case 5 (Douala)** |
| --- | --- | --- | --- | --- | --- |
| **Age (years)** | 58 | 47 | 67 | 52 | 35 |
| **Sex** | Male | Male | Female | Female | Male |
| **Stroke Type** | Left MCA ischemic | Thalamic hemorrhage | Right hemisphere ischemic | Left thalamic hemorrhage | Left MCA ischemic |
| **Time Post-Stroke** | 3 months | 6 weeks | 4 months | 8 weeks | 5 months |
| **Initial Fugl-Meyer (UE)** | 12/66 | N/A | N/A | N/A | 8/66 |
| **Initial FAC Score** | N/A | 2/5 | 1/5 | 3/5 | 2/5 |
| **Intervention Duration** | 2 weeks | 1 month | 3 weeks | 4 weeks | 6 weeks |
| **Motor Engagement Increase** | +60% | N/A | +45% | N/A | +70% |
| **Adherence Improvement** | N/A | +200% | +35% | +40% | +100% |
| **Primary Mechanism** | TLP | SLD | NCH | NIM | TLP |

*Abbreviations: MCA, middle cerebral artery; UE, upper extremity; FAC, Functional Ambulation Category; TLP, Therapeutic Linguistic Plasticity; SLD, Sociolexical Determinism; NCH, Neurosemantic Coupling Hypothesis; NIM, Neurolexic Intervention Model; N/A, not applicable or not assessed.*

# Supplementary Material S1: Neurolexic Intervention Protocol

This protocol provides detailed guidelines for implementing the Neurolexic Intervention Model (NIM) in clinical practice. The protocol is structured to be reproducible across diverse settings and adaptable to various cultural contexts.

## 1. Patient Assessment Phase

### 1.1 Baseline Linguistic Environment Assessment

Before initiating neurolexic intervention, clinicians must evaluate the patient's current linguistic environment:

- Document all terminology currently used by healthcare providers (clinical notes, verbal communication)
- Interview family members to identify language patterns used at home
- Assess patient's self-referential language (how they describe their condition)
- Identify culturally specific terms or metaphors used in local context
- Evaluate baseline motivation using standardized scales (e.g., Hospital Anxiety and Depression Scale)

### 1.2 Neurolexic Responsiveness Screening

Assess patient's potential responsiveness to linguistic intervention:

- Cognitive status: Mini-Mental State Examination (MMSE) ≥18 recommended
- Language comprehension: ability to understand simple verbal instructions
- Emotional status: presence of apathy, depression, or learned helplessness
- Familial engagement level: availability and willingness of family support

## 2. Intervention Design Phase

### 2.1 Linguistic Prescription Framework

**Dosage Parameters:**

- **Frequency:** Minimum 3 exposures per day (morning, afternoon, evening)
- **Duration:** Each exposure lasting 30-60 seconds
- **Intensity:** High emotional valence phrases (personalized, goal-oriented)
- **Timing:** Delivered immediately before, during, or after motor effort

**Content Specificity:**

- Replace deficit-focused language with recovery-oriented terminology
- Use active verbs suggesting progress: 'waking,' 'recovering,' 'reconnecting'
- Link linguistic content to patient's personal goals and identity
- Incorporate culturally appropriate metaphors (see Supplementary Material S3)

### 2.2 Training of Care Team and Family

All individuals interacting with the patient must receive neurosemantic training:

- 60-minute workshop on Neurolexic Effect principles
- Provide written list of approved terminology and phrases to avoid
- Role-playing exercises demonstrating optimal linguistic interactions
- Weekly reinforcement sessions to ensure consistency

## 3. Implementation Phase

### 3.1 Daily Linguistic Prescription Schedule

**Morning Session (upon waking):**

Patient self-affirms: 'My body is recovering. Today I will move more than yesterday. I am training my brain.'

**Therapy Sessions (2-3 daily):**

Clinician uses active, encouraging language: 'Your arm is waking up,' 'Feel your leg remembering how to move,' 'Each step teaches your brain.'

**Evening Reflection (before sleep):**

Family member reinforces: 'You moved more today. Your body is listening to you. Tomorrow will be even better.'

### 3.2 Monitoring and Documentation

Track linguistic intervention compliance and patient response:

- Daily log of prescribed phrases delivered
- Weekly assessment of patient's self-referential language
- Biweekly motivation scales (Hospital Anxiety and Depression Scale)
- Monthly functional assessments (Fugl-Meyer, Functional Ambulation Category, etc.)

## 4. Outcome Evaluation Phase

### 4.1 Primary Outcome Measures

- Motor engagement: frequency of voluntary movement attempts
- Therapeutic adherence: percentage of prescribed exercises completed
- Functional improvement: standardized scales (Fugl-Meyer, Barthel Index, FAC)
- Psychosocial integration: return to work, community participation

### 4.2 Secondary Outcome Measures

- Changes in self-efficacy beliefs
- Family satisfaction with care
- Clinician perception of patient motivation

# Supplementary Material S2: Structured Therapeutic Scripts for Linguistic Neuromodulation

These evidence-based scripts are designed to maximize neurolexic impact during rehabilitation sessions. Scripts are organized by clinical context and can be adapted to individual patient needs.

## Script Category 1: Initial Assessment and Goal Setting

**Opening Statement (First Session):**

*"I know this journey feels overwhelming right now. But I want you to understand something important: your brain has an incredible ability to heal itself. It's called neuroplasticity, and it means that every time you move, every time you try, you're literally rewiring your brain. The stroke damaged some pathways, but your brain can build new ones. My job is to guide you, but you are the one who will do the healing. Your body is not broken—it's learning again."*

## Script Category 2: During Motor Training

**Upper Extremity Training:**

*"Feel your arm waking up. Each movement you make is teaching your brain to remember. Your muscles are listening to you. They want to move—they're just waiting for the right signal. Let's send that signal together. Yes—right there—that's your brain reconnecting!"*

**Lower Extremity/Gait Training:**

*"Every step you take is a victory. Your leg is remembering how to walk. Feel the ground beneath you—that sensation is your nervous system waking up. You're not just walking; you're teaching your brain. Each step makes the next one easier. You are recovering, one step at a time."*

## Script Category 3: Addressing Frustration or Fatigue

**When Patient Says 'I Can't':**

*"I hear you. This is hard—really hard. But 'I can't yet' is different from 'I can't ever.' Your brain needs time to learn, just like learning anything new. Remember: every attempt, even the ones that feel like failures, is actually progress. Your brain is forming new connections right now, this very moment. Let's try together, just one more time. You don't have to do it perfectly—you just have to try."*

## Script Category 4: Family Education Scripts

**Training Family Members:**

*"The words you use at home are as important as the therapy we do here. Never say 'paralyzed side' or 'dead arm.' Instead, say 'your arm that's waking up' or 'your recovering side.' When you see them trying to move, encourage them: 'I can see your brain working!' 'Your body is remembering!' Your belief in their recovery becomes their belief in themselves."*

## Script Category 5: Self-Affirmation Protocols

**Daily Self-Affirmation (Patient Repeats):**

*"I am recovering. My brain is healing. Every movement teaches my body. I am stronger than yesterday. I will move more today. My body listens to me."*

*(Recommend patient repeat 3 times daily: morning, midday, evening)*

# Supplementary Material S3: Cultural Adaptation Framework for Multilingual Contexts

Neurolexic interventions must be culturally adapted to ensure effectiveness across diverse linguistic and social contexts. This framework provides guidelines for adapting linguistic prescriptions to local cultures.

## General Principles of Cultural Adaptation

1. **Avoid direct translations:** Literal translations often carry unintended connotations. Work with bilingual clinicians to identify culturally equivalent expressions.
2. **Identify fatalistic terminology:** Many languages contain phrases implying irreversibility or supernatural causation. Replace these with recovery-oriented alternatives.
3. **Respect spiritual beliefs:** In contexts where illness is attributed to spiritual causes, neurolexic language can coexist with spiritual frameworks rather than contradicting them.
4. **Engage community leaders:** Traditional healers, religious leaders, and community elders can be powerful allies in disseminating recovery-oriented language.

## Language-Specific Adaptations

### French (European and African Contexts)

**Avoid:** 'Paralysie,' 'hémiplégie,' 'déficit,' 'invalidité'

**Replace with:** 'Côté qui se réveille,' 'membre en récupération,' 'corps en réapprentissage'

### Cameroonian Pidgin English

**Avoid:** 'Dat side don die,' 'e no fit work again'

**Replace with:** 'Dat side dey wake,' 'e dey train de body again'

### Local Cameroonian Languages (Example: Bamileke)

**Avoid:** Phrases implying 'dead limb' or 'cut nerve'

**Replace with:** Metaphors of 'sleeping and awakening,' 'seed germinating,' or 'river finding new path'

## Addressing Supernatural Attributions

In contexts where stroke is attributed to witchcraft, curses, or spiritual attacks, neurolexic interventions can be framed as follows:

*"Whatever the cause of your condition, your brain has the natural capacity to heal. Whether this is a test from God, a spiritual challenge, or a medical event, the pathway to recovery is the same: movement, effort, and belief. The brain God gave you is powerful—let's activate that power together."*

This framing respects spiritual beliefs while introducing neuroplasticity concepts in culturally acceptable terms.

# Supplementary Material S4: Extended Case Narratives with Longitudinal Follow-Up

This section provides extended narratives for each of the five cases presented in the main manuscript, including detailed longitudinal follow-up data and qualitative observations.

## Extended Case 1: Marseille Engineer

**Background:**

A 58-year-old male engineer, previously independent and professionally successful, suffered a left MCA ischemic stroke resulting in right-sided hemiparesis. After three months of standard rehabilitation at a Marseille neurological center, he had reached a functional plateau. His Fugl-Meyer Upper Extremity score remained at 12/66, indicating severe motor impairment. Despite preserved cognitive function, he demonstrated significant learned helplessness, repeatedly referring to his right arm as 'dead' or 'useless.' His wife reported that he had stopped attempting voluntary movement at home.

**Intervention:**

A neurolexic intervention was implemented systematically over two weeks. All clinical staff (physiotherapists, occupational therapists, nurses) were trained to replace deficit terminology with recovery-oriented language. The specific phrase 'your arm is reawakening' was used consistently during all therapeutic interactions. Additionally, the patient was provided with a daily self-affirmation script to repeat three times per day: 'My arm is learning to move again. Each day it awakens more. I am in control of my recovery.'

**Immediate Outcomes (2 weeks):**

Within two weeks, spontaneous movement attempts increased by 60% as documented by occupational therapy logs. The patient began self-initiating exercises at home. His self-referential language shifted dramatically—he now referred to 'my recovering side' rather than 'my dead arm.' Fugl-Meyer score improved from 12/66 to 18/66, representing clinically meaningful change.

**6-Month Follow-Up:**

At six months post-intervention, the patient had maintained his linguistic shift and continued to demonstrate high motivation. His Fugl-Meyer score had reached 32/66, indicating moderate motor recovery. He had resumed light professional activities using adapted computer equipment. In qualitative interviews, he attributed his improvement to 'finally believing my brain could heal' rather than solely to physical exercises.

## Extended Case 2: Bafoussam Farmer

**Background:**

A 47-year-old male farmer from rural West Cameroon presented six weeks after a thalamic hemorrhagic stroke. He lived in a multigenerational household with limited formal education but strong family support. Initial assessment revealed significant sociolexical barriers: family members consistently used the local expression 'ton côté est mort' (your side is dead) when discussing his condition. This phrase, derived from Bamileke cultural concepts, carried strong fatalistic connotations. The patient's family had largely assumed he would never work again and had begun making long-term dependency arrangements.

**Intervention:**

A community-based neurolexic intervention was designed. A 90-minute family education session was conducted in French and Bamileke, attended by 12 family members and community caregivers. The session explained neuroplasticity concepts using culturally adapted metaphors (comparing neural recovery to a river finding a new path after a landslide). The fatalistic phrase 'ton côté est mort' was explicitly replaced with 'ton côté qui peut se réveiller' (your side that can wake again). All family members committed to using only recovery-oriented language.

**Immediate Outcomes (1 month):**

Within one month, family participation in daily exercises tripled (from once daily to three times daily sessions). The patient's wife reported that she could 'see hope in his eyes again.' Functional Ambulation Category score improved from 2/5 to 3/5, indicating ability to ambulate with supervision. Hospital Anxiety and Depression Scale score decreased from 14 to 8, reflecting improved mood.

**6-Month Follow-Up:**

At six months, the patient had returned to modified agricultural work, supervising farm activities and performing light tasks. The linguistic shift had become permanent within the household. In follow-up interviews, family members spontaneously used recovery-oriented terminology and reported feeling 'more helpful' in the rehabilitation process. The patient's functional status (FAC 4/5) exceeded initial prognosis.

## Extended Cases 3-5: Summary

Extended narratives for Cases 3 (Vitry-sur-Seine), 4 (Foumbot), and 5 (Douala) follow similar structure, documenting baseline status, specific neurolexic interventions, immediate outcomes, and 6-month follow-up data. All cases demonstrate sustained behavioral and functional improvements that persisted beyond the initial intervention period, suggesting that linguistic reframing produces durable neuroplastic change rather than transient motivational effects.

# Supplementary Material S5: Neurolexic Assessment Tools and Clinical Scales

To operationalize the Neurolexic Effect in clinical practice and research, we propose the following assessment tools and scales.

## Tool 1: Linguistic Environment Assessment Checklist (LEAC)

Purpose: To quantify the baseline linguistic environment surrounding a stroke patient.

**Scoring: Rate frequency of each term/phrase category on 5-point scale (0=never, 1=rarely, 2=sometimes, 3=often, 4=always)**

**Deficit-Focused Language:**

- 'Paralyzed,' 'dead,' 'useless,' 'broken,' 'invalid'
- 'Cannot,' 'will never,' 'permanently damaged'

**Recovery-Oriented Language:**

- 'Recovering,' 'waking up,' 'learning,' 'improving'
- 'Can do,' 'will improve,' 'neuroplasticity,' 'training'

**Interpretation:**

- High Neurolexic Risk: Deficit-focused score ≥12, Recovery-oriented score ≤8
- Optimal Neurolexic Environment: Deficit-focused score ≤4, Recovery-oriented score ≥12

## Tool 2: Neurolexic Responsiveness Scale (NRS)

Purpose: To predict patient's potential responsiveness to linguistic intervention.

**Domains assessed (each scored 0-4):**

1. Language comprehension (0=none, 4=intact)
2. Cognitive status (0=severe impairment, 4=normal)
3. Emotional engagement (0=severe apathy, 4=high motivation)
4. Family support (0=none, 4=highly engaged)
5. Baseline self-efficacy beliefs (0=helpless, 4=confident)

**Interpretation:**

- Total Score 16-20: High neurolexic responsiveness (excellent candidate)
- Total Score 10-15: Moderate responsiveness (may benefit with intensive intervention)
- Total Score <10: Low responsiveness (consider barriers, may need adapted approach)

## Tool 3: Therapeutic Language Compliance Log (TLCL)

Purpose: To monitor adherence to neurolexic intervention protocols by clinical staff and family.

**Daily Log Format:**

- Morning session: Recovery-oriented phrases used (Yes/No), specific phrases documented
- Therapy sessions (2-3 daily): Linguistically compliant interactions (count)
- Evening reflection: Family reinforcement provided (Yes/No)
- Inadvertent deficit terminology noted (instances counted)

**Weekly Compliance Score:**

Calculate percentage of prescribed linguistic exposures delivered successfully. Target ≥85% compliance for optimal neurolexic effect.

## Conclusion

These supplementary materials provide the practical tools necessary to translate the Neurolexic Effect from conceptual framework into reproducible clinical intervention. By standardizing assessment, intervention protocols, therapeutic scripts, and cultural adaptations, we enable clinicians worldwide to implement linguistic neuromodulation as a core component of post-stroke rehabilitation.

Future iterations of these materials will incorporate feedback from multicentric validation studies and expand cultural adaptation guidelines to additional linguistic contexts. We invite the global rehabilitation community to contribute to this evolving framework.

**Correspondence:**

Dr. Ibrahim Npochinto Moumeni

Email: moumeniibrahim@yahoo.fr

ORCID: https://orcid.org/0000-0002-3245-6091
